# Supplementary material
Source: PubMed Central journal article supplement (PMC10991951)
Supplement: 262_2022_3213_MOESM1_ESM.pdf [file 262_2022_3213_MOESM1_ESM.pdf]

*Supplementary Data*

**Circulating extracellular vesicles carrying Firmicutes reflective of the local immune status  
may predict clinical response to pembrolizumab in urothelial carcinoma patients**

Kentaro Jingushi<sup>1†</sup>, Atsunari Kawashima<sup>2\*†</sup>, Takuro Saito<sup>3,4†</sup>, Takayuki Kanazawa<sup>4</sup>, Daisuke Motooka<sup>5</sup>, Tomonori Kimura<sup>6</sup>, Masashi Mita<sup>7</sup>, Akinaru Yamamoto<sup>2</sup>, Toshihiro Uemura<sup>2</sup>, Gaku Yamamichi<sup>2</sup>, Koichi Okada<sup>2</sup>, Eisuke Tomiyama<sup>2</sup>, Yoko Koh<sup>2</sup>, Makoto Matsushita<sup>2</sup>, Taigo Kato<sup>2</sup>, Koji Hatano<sup>2</sup>, Motohide Uemura<sup>2</sup>, Kazutake Tsujikawa<sup>1</sup>, Hisashi Wada<sup>4</sup>, and Norio Nonomura<sup>2</sup>  
Correspondence to: kawashima@uro.med.osaka-u.ac.jp

**This PDF file includes:**

Materials and Methods  
Supplementary Text  
Figs. S1 to S5  
Tables S1

## Figure legends

**Figure S1.** Immunological status of previously reported peripheral and tumor tissue-infiltrated T cells. Characterization of tumor tissue-infiltrated (a) and peripheral T cells (b). (c) Classification of T cells based on the expression of surface immune checkpoint markers. Samples not used in this study are filled in black. (d) Number of tumor tissue-infiltrated T cells. (e) Frequency of tumor tissue-infiltrated CD8<sup>+</sup> cells (left panel). Expression of immune checkpoint markers in CD8<sup>+</sup> cells based on immunological classification (right panel). (f) Frequency of tumor tissue-infiltrated CD4<sup>+</sup> cells (left panel). Expression of immune checkpoint markers in CD4<sup>+</sup> cells based on immunological classification (right panel). (g) Frequency of peripheral CD8<sup>+</sup> cells (left panel). Expression of immune checkpoint markers in CD8<sup>+</sup> cells based on immunological classification (right panel). (h) Frequency of peripheral CD4<sup>+</sup> cells (left panel). Expression of immune checkpoint markers in CD4<sup>+</sup> cells based on immunological classification (right panel). Mann–Whitney test (Two-tailed). \* $p < 0.05$ ; \*\* $p < 0.01$ ; \*\*\* $p < 0.001$ ; \*\*\*\* $p < 0.0001$ . Exact  $p$  values for (e):  $p = 0.011$  (left panel),  $p = 0.04$  (PD-1),  $p < 0.0001$  (Tim-3),  $p = 0.0007$  (CD25),  $p = 0.0001$  (ICOS),  $p = 0.003$  (4-1BB),  $p = 0.0004$  (OX40); for (f):  $p = 0.0026$  (left panel),  $p = 0.36$  (CD45RA),  $p = 0.24$  (PD-1),  $p = 0.0005$  (Tim-3),  $p < 0.0001$  (CD25<sup>high</sup>),  $p = 0.0004$  (ICOS),  $p < 0.0001$  (4-1BB),  $p < 0.0001$  (OX40); for (g):  $p = 0.52$  (CD45RA),  $p = 0.30$  (PD-1),  $p = 0.21$  (Tim-3),  $p = 0.41$  (CD25),  $p = 0.017$  (ICOS),  $p = 0.91$  (4-1BB),  $p = 0.16$  (OX40); for (h):  $p = 0.34$  (CD45RA),  $p = 0.25$  (PD-1),  $p = 0.71$  (Tim-3),  $p = 0.0055$  (CD25<sup>high</sup>),  $p = 0.037$  (ICOS),  $p = 0.29$  (4-1BB),  $p = 0.90$

**Figure S2.** No significant difference in Bacteroidetes phylum or F:B (Firmicutes:Bacteroidetes) ratio among the immunologically categorized groups. (a) Percentage Bacteroidetes abundance based on immunological classification (Group I: 30, Group II: 20). (b) F:B ratio based on immunological classification. Mann–Whitney test (Two-tailed). (c) F:B ratio-based ROC analysis. Fisher's exact probability test. (d) Cumulative bar chart based on F:B ratio. Fisher's exact probability test

**Figure S3.** Cumulative bar chart based on abundance of peripheral Armatimonadetes (a), Elusimicrobia (b), and Nitrospirae (c). Fisher's exact probability test.

**Figure S4.** Expression of immune checkpoint markers in myeloid cells based on peripheral Firmicutes abundance (g) or presence/absence of AEN (h). for (g):  $p = 0.80$  (CCR2),  $p = 0.96$  (PD-L1); for (h):  $p = 0.51$  (CCR2),  $p = 0.54$  (PD-L1)

**Figure S5.** F:B (Firmicutes:Bacteroidetes) ratio-based prognosis analysis. (a) Cumulative bar chart based on the F:B ratio. Fisher's exact probability test. Progression-free survival ratio (b) and cancer-specific survival ratio (c) based on the F:R ratio

Fig. S1

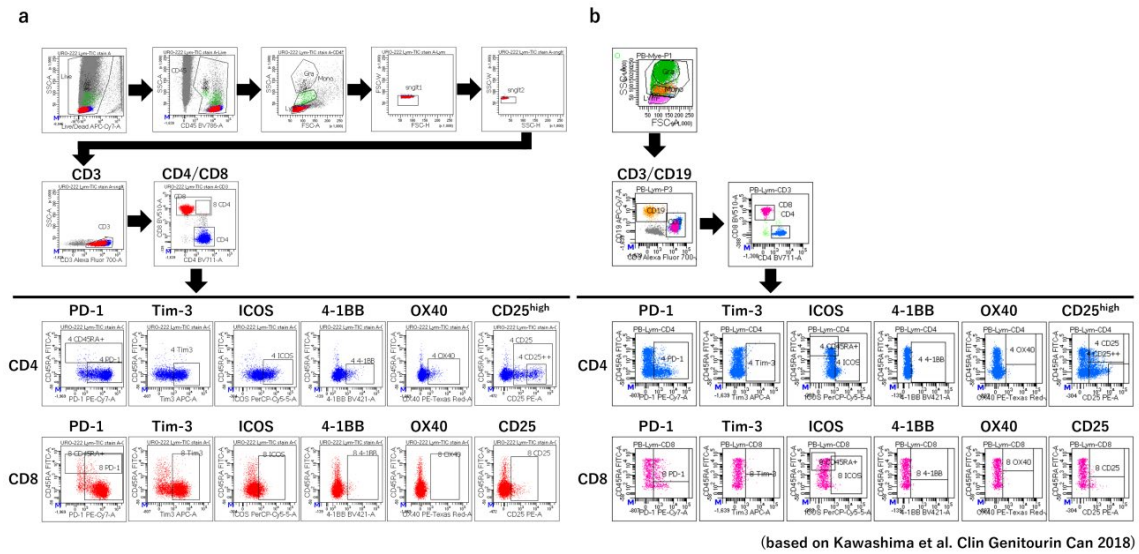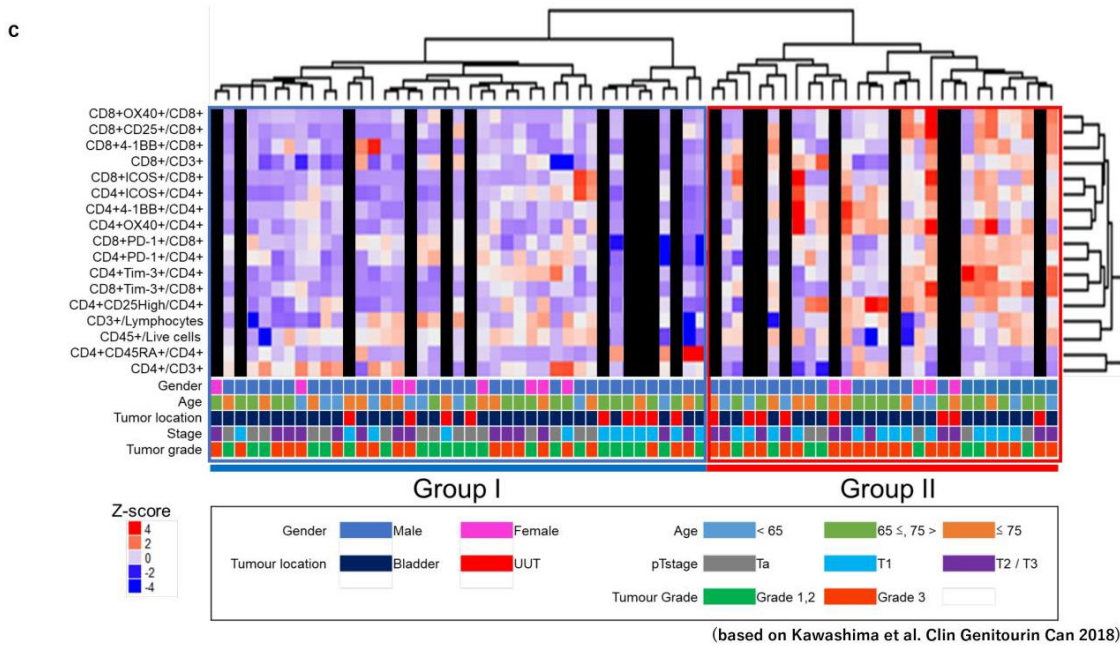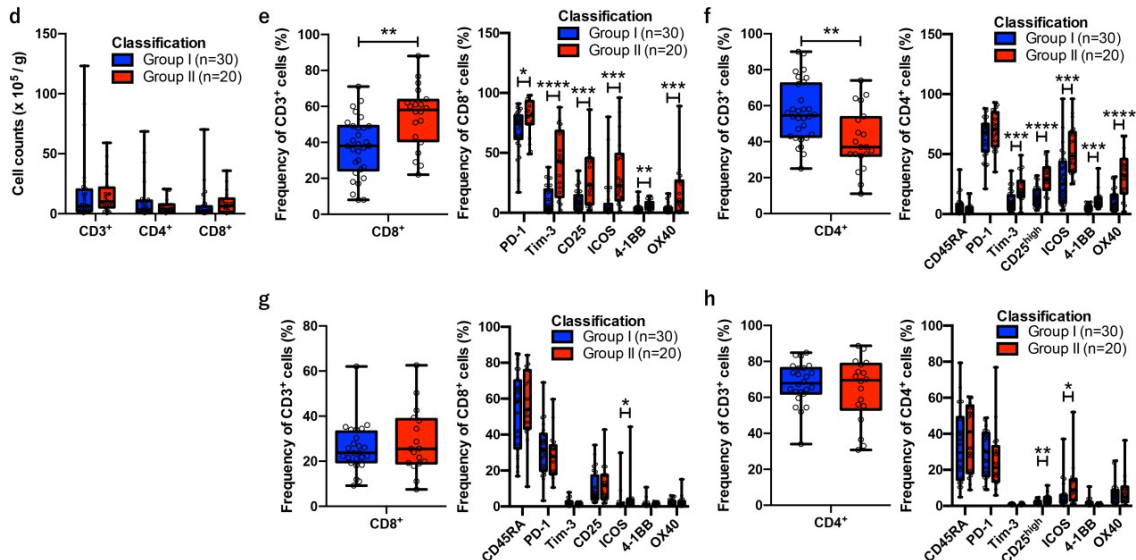

Fig. S2

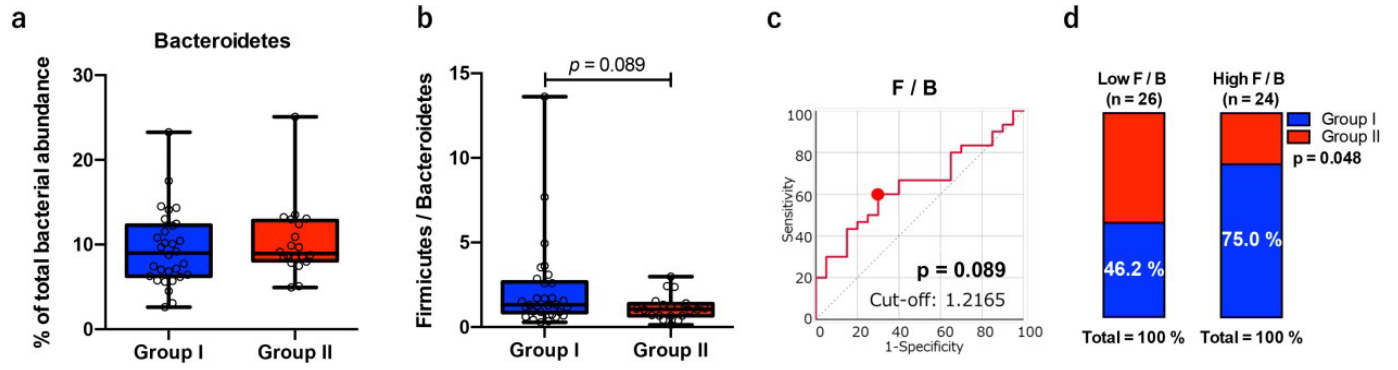

Fig. S3

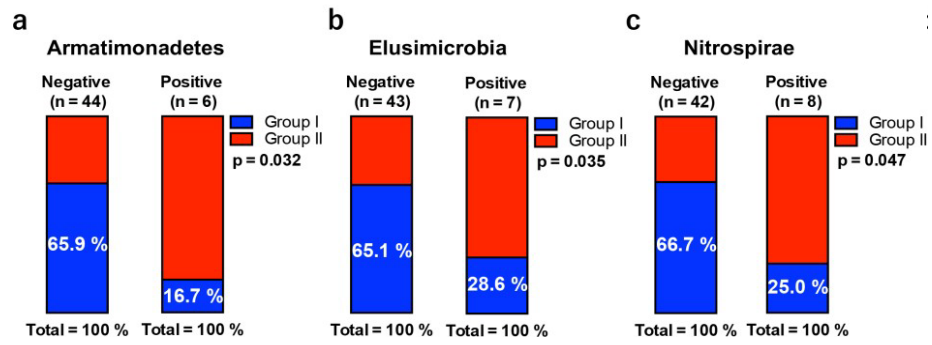

Fig. S4

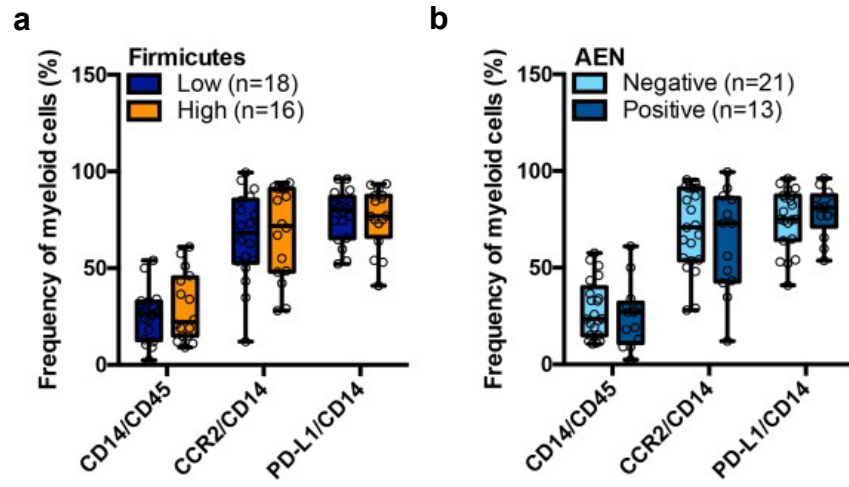

**Fig. S5**

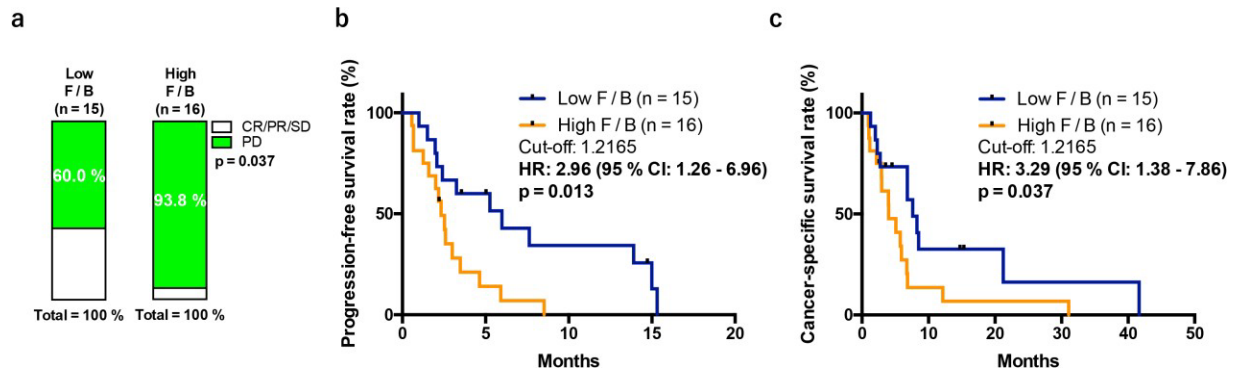

Table S1. Clinical characteristics of the patients enrolled in this study

| Clinical specimens                      | Healthy Donor<br>(n = 20) | Localized UC<br>(n = 50) | Metastatic UC<br>(n = 31) |
|-----------------------------------------|---------------------------|--------------------------|---------------------------|
| Age (median) (years)                    | 47–91 (70.5)              | 47–90 (70.5)             | 45–87 (73.0)              |
| Sex                                     |                           |                          |                           |
| Male                                    | 5                         | 41                       | 20                        |
| Female                                  | 15                        | 9                        | 11                        |
| Tumour location                         |                           |                          |                           |
| Bladder                                 | N/A                       | 50                       | 9                         |
| Pelvis                                  | N/A                       | 0                        | 7                         |
| Ureter                                  | N/A                       | 0                        | 15                        |
| BMI (median) (kg/m <sup>2</sup> )       | 17.9–27.8 (21.8)          | 17.9–37.6 (23.9)         | 14.9–27.4 (20.2)          |
| Smoking status                          |                           |                          |                           |
| Current                                 | 0                         | 12                       | 2                         |
| Former                                  | 4                         | 13                       | 8                         |
| Never                                   | 16                        | 25                       | 21                        |
| Histological type                       |                           |                          |                           |
| UC only                                 | N/A                       | 49                       | 31                        |
| UC with Sq                              | N/A                       | 1                        | 0                         |
| pT stage                                |                           |                          |                           |
| a                                       | N/A                       | 19                       | 0                         |
| 1                                       | N/A                       | 15                       | 0                         |
| 2 and more                              | N/A                       | 16                       | 31                        |
| Surgical treatment just before analysis |                           |                          |                           |
| TURBT or biopsy                         | N/A                       | 50                       | 18                        |
| Radical treatment                       | N/A                       | 0                        | 13                        |
| Systemic inflammatory disease           |                           |                          |                           |
| No                                      | N/A                       | 46                       | 0                         |
| Yes                                     | N/A                       | 4                        | 31                        |
| Tumour grade (highest) <sup>a</sup>     |                           |                          |                           |
| Grade 2                                 | N/A                       | 23                       | 0                         |
| Grade 3                                 | N/A                       | 27                       | 31                        |
| Tumour grade (highest) <sup>b</sup>     |                           |                          |                           |
| Low grade                               | N/A                       | 4                        | 0                         |
| High grade                              | N/A                       | 46                       | 31                        |
| Immunological Classification            |                           |                          |                           |
| Class I                                 | N/A                       | 30                       | N/A                       |
| Class II                                | N/A                       | 20                       | N/A                       |
| NLR (median)                            | 1.03–5.72(1.74)           | 0.61–16.60(2.39)         | 1.54–23.69 (5.66)         |
| PLR (median)                            | 0.48–1.71(0.72)           | 0.26–3.05 (0.81)         | 0.49–7.41 (1.50)          |
| MLR (median)                            | 0.11–0.44(0.20)           | 0.10–0.85 (0.23)         | 0.15–1.41 (0.52)          |
| FAN score                               |                           |                          |                           |
| 0, 1                                    | 20                        | 47                       | 14                        |
| 2, 3                                    | 0                         | 3                        | 16                        |

UC = urothelial carcinoma; N/A = not applicable; Sq = squamous; NLR = neutrophil-to-lymphocyte ratio; PLR = platelet-to-lymphocyte ratio; MLR = monocyte-to-lymphocyte ratio; FAN score = Fib-4 index, ALBI score and NLR Score. <sup>a</sup>By the 1973 World Health Organization (WHO) grading system. <sup>b</sup>By the 2004 WHO grading system.
